# Supplementary material for: Presynaptically Localized Cyclic GMP-Dependent Protein Kinase 1 Is a Key Determinant of Spinal Synaptic Potentiation and Pain Hypersensitivity
Source: PLOS journal article supplement (doi:10.1371/journal.pbio.1001283), 2012-03-13

## Supplementary figure - 1

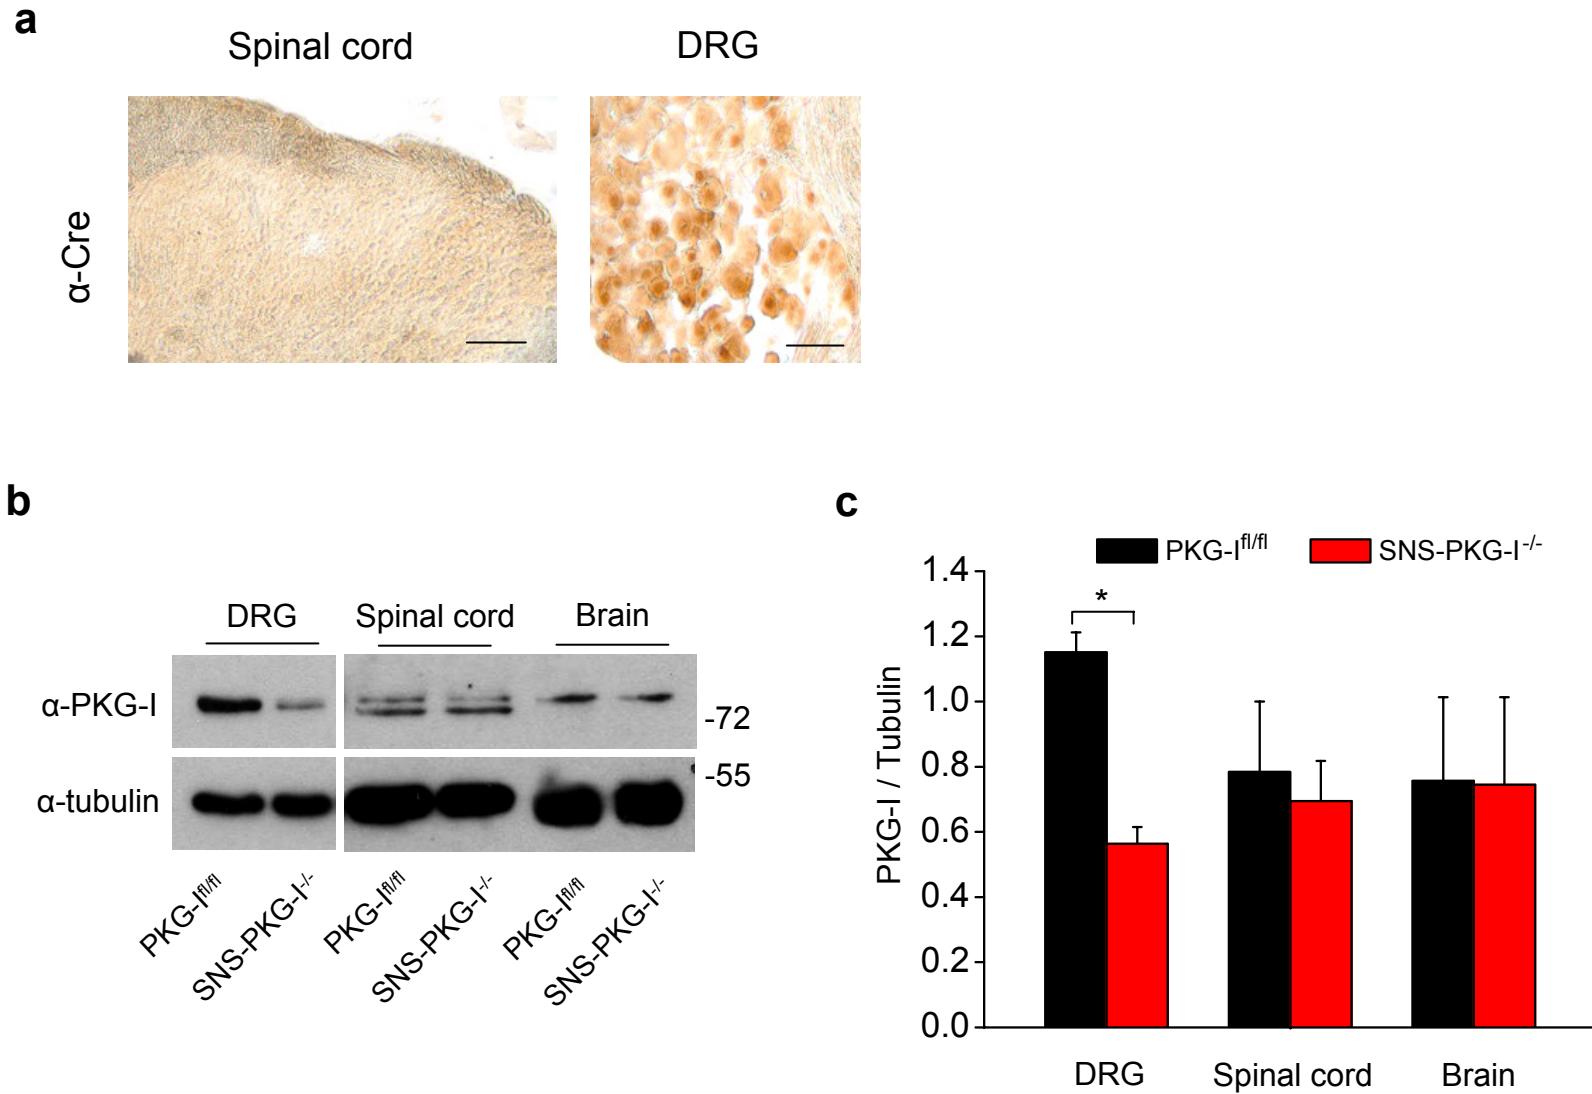

Supplement: S1 (10.1371/journal.pbio.1001283.s001) [file journal.pbio.1001283.s001.PDF]
