# Supplementary material for: Presynaptically Localized Cyclic GMP-Dependent Protein Kinase 1 Is a Key Determinant of Spinal Synaptic Potentiation and Pain Hypersensitivity
Source: PLOS journal article supplement (doi:10.1371/journal.pbio.1001283), 2012-03-13
Supplement: S2 (10.1371/journal.pbio.1001283.s002) [file journal.pbio.1001283.s002.PDF]

Supplementary Fig. 2

a

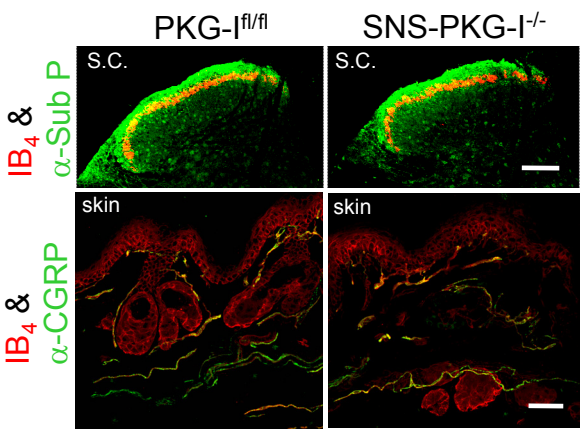

b

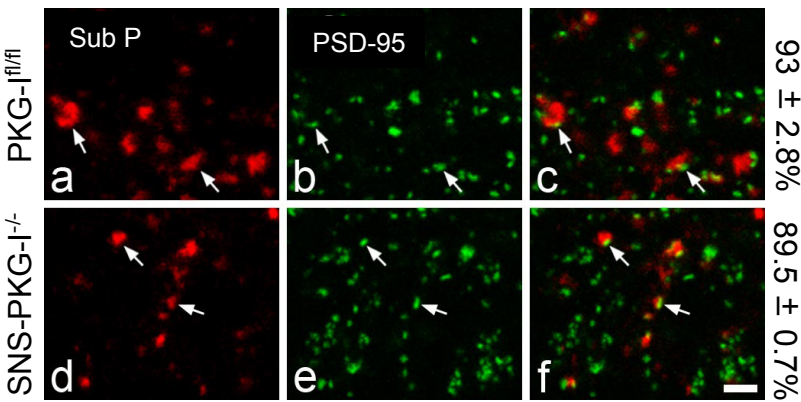

c

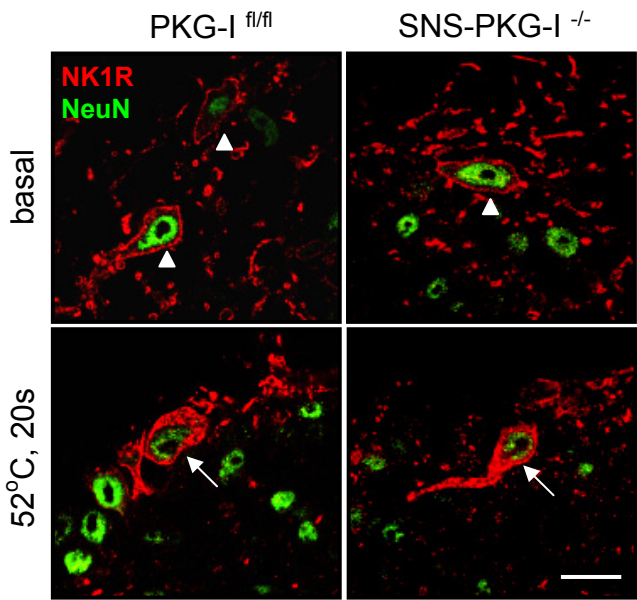

d

| Genotype                 | Percentage of NK1 receptor internalized cells   |            |
|--------------------------|-------------------------------------------------|------------|
|                          | number of NK1receptor internalized cells        |            |
|                          | Total number of NK1receptor positive cells X100 |            |
|                          | Basal                                           | Stimulated |
| PKG-I <sup>fl/fl</sup>   | 0.01%                                           | 73.1%      |
| SNS-PKG-I <sup>-/-</sup> | 0.03%                                           | 77.7%      |

e

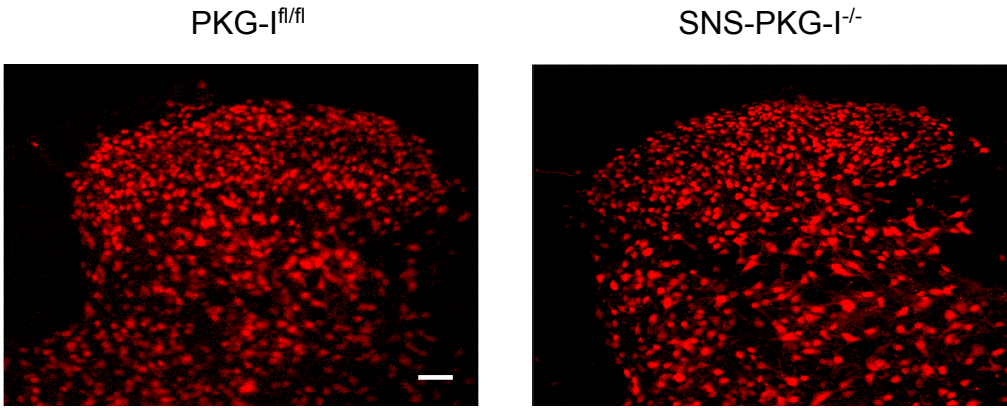

Spinal cord: anti-NeuN
