# Supplementary material for: Presynaptically Localized Cyclic GMP-Dependent Protein Kinase 1 Is a Key Determinant of Spinal Synaptic Potentiation and Pain Hypersensitivity
Source: PLOS journal article supplement (doi:10.1371/journal.pbio.1001283), 2012-03-13

Supplementary Fig - 4

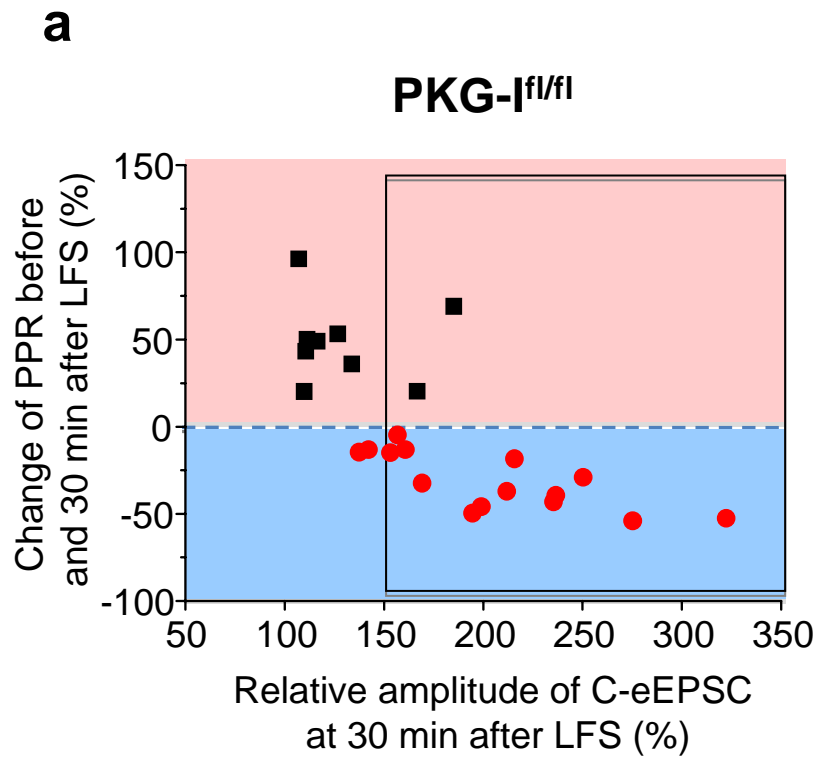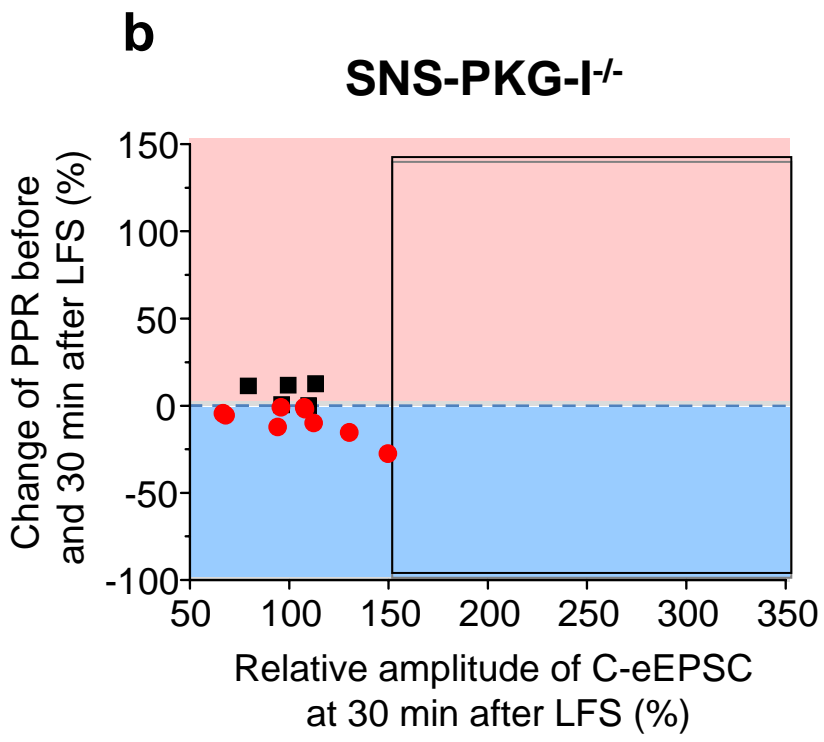

Supplement: S4 (10.1371/journal.pbio.1001283.s004) [file journal.pbio.1001283.s004.PDF]
